# Supplementary material
Source: ML conference proceedings conference paper supplement (https://openreview.net/forum?id=eIFZtkshgH)
Supplement: supplementary_material [file attachment]

## A Appendix for AD-PT: Autonomous Driving Pre-training with Large-scale Point Cloud Dataset

In this supplementary material, we provide more details and experimental results not included in our main text.

### Outlines:

- Sec. **B**: More details about large-scale pre-training dataset preparation.
  - Sec. **B.1**: Preliminary experiments on class-aware pseudo label generator.
  - Sec. **B.2**: Analysis on pseudo label threshold on different classes.
  - Sec. **B.3**: Visualization results of pseudo labels.
  - Sec. **B.4**: Details of object re-scaling.
  - Sec. **B.5**: Taxonomy difference between different datasets.
- Sec. **C**: Detailed dataset description and evaluation metrics.
  - Sec. **C.1**: Dataset description.
  - Sec. **C.2**: Evaluation metrics.
- Sec. **D**: More implementation details.
- Sec. **E**: More experimental results.
  - Sec. **E.1**: Ablation studies on unknown-aware instance learning head.
  - Sec. **E.2**: More results of pre-training scalability.
  - Sec. **E.3**: Results of fine-tuning on ONCE.
  - Sec. **E.4**: Visualization results.

## B More Details about Large-scale Pre-training Dataset Preparation.

In this section, we give some preliminary experimental results and analysis on large-scale pre-training dataset preparation.

### B.1 Preliminary Experiments on Class-aware Pseudo Label Generator

As mentioned in Sec. 3.2.1 in our submission, we explore how to improve the performance on ONCE. We first analyze the results in the ONCE benchmark and find that CenterPoint reaches the SOTA performance on pedestrian and cyclist while PV-RCNN achieves the best performance on vehicle. To use a stronger baseline to further improve the performance, we conduct experiments using PV-RCNN++ as the baseline detector. As shown in Tab. 10, PV-RCNN++ with center head can not obtain a satisfactory performance on ONCE while PV-RCNN++ with anchor head can achieve better accuracy on vehicle and pedestrian.

Further, to obtain more accurate pseudo labels, we use a semi-supervised learning method to further improve the performance as shown in Tab. 11. Finally, we individually train pedestrian using CenterPoint and other classes using PV-RCNN++.

Table 10: Effects of using different heads on PV-RCNN++. We report mAP using the ONCE evaluation metric.

| Detector  | Head Choice | Vehicle      | Pedestrian   | Cyclist      |
|-----------|-------------|--------------|--------------|--------------|
| PV-RCNN++ | Center Head | 71.61        | <b>45.27</b> | 61.15        |
| PV-RCNN++ | Anchor Head | <b>81.72</b> | 43.86        | <b>66.17</b> |

### B.2 Analysis on Pseudo Label Threshold on Different Classes

Fig. 7 shows the precision under different IoU thresholds. The precision can be calculated by  $\text{Precision} = \text{TP} / (\text{FP} + \text{TP})$ , where FP and TP denote false positive and true positive, respectively. We can observe that when IoU thresholds are more than 0.8, 0.7, 0.7 for vehicle, pedestrian and cyclist, the number of TP instances is significantly more than that of FP instances.

Table 11: Effects of using MeanTeacher. We report mAP using the ONCE evaluation metric.

| Detector    | MeanTeacher | Vehicle      | Pedestrian   | Cyclist      |
|-------------|-------------|--------------|--------------|--------------|
| CenterPoint | ✗           | -            | 46.22        | -            |
| CenterPoint | ✓           | -            | <b>56.01</b> | -            |
| PV-RCNN++   | ✗           | 81.72        | -            | 66.17        |
| PV-RCNN++   | ✓           | <b>82.50</b> | -            | <b>71.19</b> |

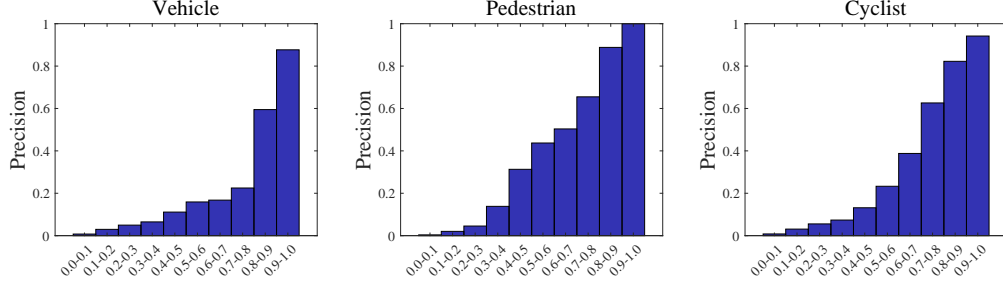

Figure 7: The Precision under different IoU thresholds.

40 The visualization of the pseudo label results under different thresholds in Fig. 8, we can see that  
 41 some FP pseudo labels will be annotated when setting low thresholds, while some TP instances can  
 42 not be annotated when the thresholds are relatively high. To more intuitively see the impact of the  
 43 threshold on pseudo labeling, we use the model to annotate the samples of the ONCE validation set  
 44 for comparison with ground-truths.

### 45 B.3 Visualization Results of Pseudo Labels

46 Fig. 9 shows the visualization results of our final pseudo label results.

### 47 B.4 Details of Object Re-scaling

48 In detail, given a bounding box  $b = (c_x, c_y, c_z, l, w, h, \theta_h)$  and point clouds  $(p_i^x, p_i^y, p_i^z)$  within it, where  
 49  $(c_x, c_y, c_z)$ ,  $(l, w, h)$  and  $\theta_h$  denote the center, size and heading angle of the bounding box. We first  
 50 transform points into the local coordinate with the following formula:

$$\begin{aligned}
 (p_i^l, p_i^w, p_i^h) &= (p_i^x - c_x, p_i^y - c_y, p_i^z - c_z) \cdot R, \\
 R &= \begin{bmatrix} \cos \theta_h & -\sin \theta_h & 0 \\ \sin \theta_h & \cos \theta_h & 0 \\ 0 & 0 & 1 \end{bmatrix}, \tag{1}
 \end{aligned}$$

51 where  $\cdot$  is matrix multiplication. Then, to derive the scaled object, the point coordinates inside the  
 52 box and the bounding box size are scaled to be  $\alpha(p_i^l, p_i^w, p_i^h)$  and  $\alpha(l, w, h)$ , where  $\alpha$  is the scaling  
 53 factor. Finally, the points inside the scaled box are transformed back to the ego-car coordinate system  
 54 and shifted to the center  $(c_x, c_y, c_z)$  as

$$\tilde{p}_i = \alpha(p_i^l, p_i^w, p_i^h) \cdot R^T + (c_x, c_y, c_z). \tag{2}$$

### 55 B.5 Taxonomy difference between different datasets

56 As shown in Tab. 12, there exists a huge taxonomy difference between some fine-tuning datasets and  
 57 the pre-training dataset. As a result, some foreground instances may be regarded as background if  
 58 only using pseudo label as supervision.

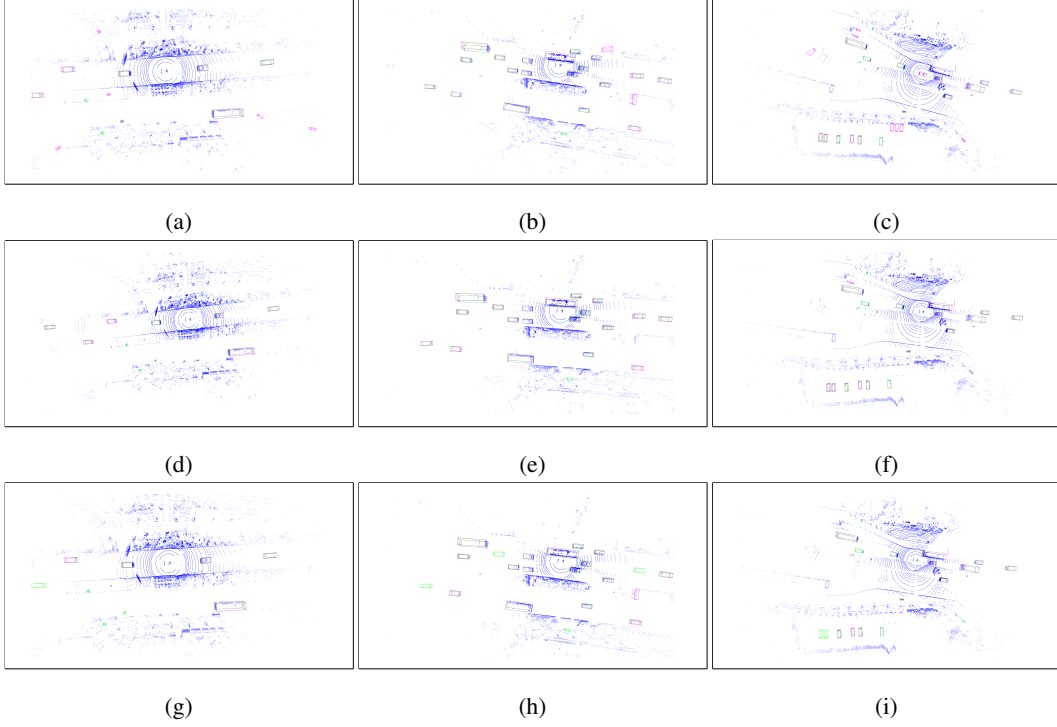

Figure 8: Visualization results under different pseudo label thresholds. (a-c): annotations with low thresholds (*i.e.*, 0.6, 0.5, 0.5 for vehicle, pedestrian and cyclist, respectively). (d-f): the thresholds used in our methods. (g-i): high thresholds (*i.e.*, 0.9, 0.8, 0.8 for vehicle, pedestrian and cyclist, respectively). The green and red bounding boxes represent ground-truths and detector predictions, respectively.

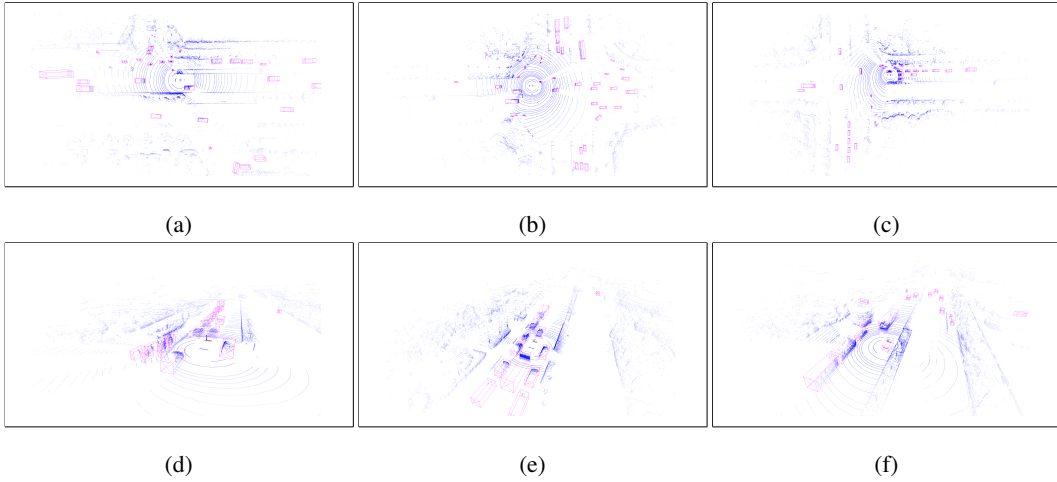

Figure 9: Pseudo-labeled annotation results on unlabeled set.

## 59 C Detailed Dataset Description and Evaluation Metrics

### 60 C.1 Dataset Description

61 **ONCE dataset.** ONCE dataset [4] is a large-scale dataset that is built to encourage the exploration  
62 of self-supervised and semi-supervised learning in the autonomous driving scenario. ONCE is  
63 collected by a 40-beam LiDAR in multiple cities in China and contains diverse weather conditions

Table 12: Taxonomy difference between different datasets.

| Dataset              | classes                                                                                                |
|----------------------|--------------------------------------------------------------------------------------------------------|
| ONCE (Pre-train)     | Car, Truck, Bus, Pedestrian, Cyclist                                                                   |
| Waymo (Fine-tune)    | Vehicle, Pedestrian, Cyclist                                                                           |
| nuScenes (Fine-tune) | Car, Truck, Construction vehicle, Bus, Trailer, Barrier, Motorcycle, Bicycle, Pedestrian, Traffic cone |
| KITTI (Fine-tune)    | Car, Pedestrian, Cyclist                                                                               |

64 (*e.g.*, sunny, cloudy, rainy), traffic conditions, time periods (*e.g.*, morning, noon, afternoon, night) and  
65 areas (*e.g.*, downtown, suburbs, highway, tunnel, bridge).

66 **Waymo Open Dataset.** Waymo Open Dataset [5] is a widely-used large-scale autonomous driving  
67 dataset that is composed of 1000 sequences and divided into a train set with 798 sequences ( $\sim 150k$   
68 samples) and a validation set with 202 sequences ( $\sim 40k$  samples). The Waymo dataset is gathered in  
69 the USA by a 64-beam LiDAR and 4 200-beam short-range LiDAR with annotations in full  $360^\circ$ .  
70 We use the 1.0 version of Waymo Open Dataset.

71 **nuScenes Dataset.** NuScenes dataset [1] provides point cloud data from 32-beam LiDAR collected  
72 from Singapore and Boston, USA. It consists of 28130 training samples and 6019 validation samples.  
73 The data is obtained during different times in the day, different weather conditions and a diverse set  
74 of locations (*e.g.*, urban, residential, nature and industrial).

75 **KITTI Dataset.** KITTI dataset [2] is a common-used autonomous driving dataset that contains  
76 7481 training samples and is divided into a train set with 3712 samples and a validation set with 3769  
77 samples. The point cloud data is collected by a 64-beam LiDAR in Germany. KITTI dataset only  
78 provides the annotations for the objects within the field of view of the front RGB camera.

## 79 C.2 Evaluation Metrics

80 **ONCE evaluation metric.** Following ONCE official evaluation metric, we merge the car, bus and  
81 truck class into a super-class (*i.e.*, vehicle).  $AP_{3D}^{Ori}$  is used to evaluate the performance of the ONCE  
82 dataset, which can be obtained by the following formula:

$$AP_{3D}^{Ori} = 100 \int_0^1 \max\{p(r') | r' \geq r\} dr, \quad (3)$$

83 where  $r$  is recall rates from 0.02 to 1.00 at step 0.02 and  $p(r)$  denotes the precision-recall curve.  
84 Mean average precision (mAP) is the average of the scores of the three categories. The Intersection  
85 over Union (IoU) thresholds are set to 0.7, 0.3 and 0.5 for vehicle, pedestrian and cyclist, respectively.

86 **Waymo evaluation metric.** Two difficulty levels (*i.e.*, LEVEL 1 and LEVEL 2) are utilized  
87 to evaluate the detection accuracy of Waymo dataset and we mainly focus on more difficult L2  
88 performance. Among each difficulty level, we report AP and APH which can be formulated as:

$$AP = 100 \int_0^1 \max\{p(r') | r' \geq r\} dr, \quad AP = 100 \int_0^1 \max\{h(r') | r' \geq r\} dr, \quad (4)$$

89 where the different between  $h(r)$  and  $p(r)$  is  $h(r)$  is weighted by the accuracy of heading accuracy.

90 **nuScenes evaluation metric.** Following the official NuScenes Evaluation Metric, we report mAP  
91 and nuScenes detection score (NDS). AP is defined as matches by thresholding the 2D center distance  
92  $d$  on the ground plane and the mAP can be calculated by:

$$mAP = \frac{1}{|\mathbb{C}|} \frac{1}{|\mathbb{D}|} \sum_{c \in \mathbb{C}} \sum_{d \in \mathbb{D}} AP, \quad (5)$$

93 where  $\mathbb{C}$  is the set of classes and  $\mathbb{D}$  is the set of thresholds (*i.e.*,  $\{0.5, 1, 2, 4\}$ ). We mainly focus on 10  
94 classes. NDS is the weighted of mAP and five true positive metrics, including Average Translation

Error (ATE), Average Scale Error (ASE), Average Orientation Error (AOE), Average Velocity Error (AVE) and Average Attribute Error (AAE). The NDS can be formulated as:

$$mTP = \frac{1}{\mathbb{C}} \sum_{c \in \mathbb{C}} TP_c, \quad NDS = \frac{1}{10} [5mAP + \sum_{mTP \in \mathbb{TP}} (1 - \min(1, mTP))], \quad (6)$$

where  $\mathbb{TP}$  is the set of true positive metrics.

**KITTI evaluation metric.** We report mAP with 40 recall positions to evaluate the detection performance and the 3D IoU thresholds is set to 0.7 for cars and 0.5 for pedestrians and cyclists.

## D More Implementation Details

As shown in Tab. 13, we list some details about pre-training and fine-tuning datasets. Note that the voxel size of nuScenes is set to [0.1, 0.1, 0.2] following [3]. It can be seen that different datasets may have different dimensions of input features (*e.g.*, ONCE use 4 dimension features as input while Waymo and nuScenes use 5 dimension features) causing the input dimension of the first layer network to be different. We simply do not load the parameters of the first layer when this happens while fine-tuning. In the pre-training phase, we merge the pseudo-labeled data and a small amount of labeled data (*i.e.*, ONCE train set) as the pre-training dataset. In the fine-tuning phase, we fine-tune 30 epochs for Waymo, 20 epochs for nuScenes and 80 epochs for KITTI.

Table 13: Some implementation details about pre-training and fine-tuning datasets.

| Dataset              | Point cloud range                     | voxel size        | input features                   |
|----------------------|---------------------------------------|-------------------|----------------------------------|
| ONCE (Pre-train)     | [-75.2, -75.2, -5.0, 75.2, 75.2, 3.0] | [0.1, 0.1, 0.2]   | [x, y, z, intensity]             |
| Waymo (Fine-tune)    | [-75.2, -75.2, -2.0, 75.2, 75.2, 4.0] | [0.1, 0.1, 0.15]  | [x, y, z, intensity, elongation] |
| nuScenes (Fine-tune) | [-51.2, -51.2, -5.0, 51.2, 51.2, 3.0] | [0.1, 0.1, 0.2]   | [x, y, z, intensity, timestamp]  |
| KITTI (Fine-tune)    | [0.0, -40.0, -3.0, 70.4, 40.0, 1.0]   | [0.05, 0.05, 0.1] | [x, y, z, intensity]             |

## E More Experimental Results

### E.1 Ablation Studies on Unknown-aware Instance Learning Head

In this part, we conduct experiments to ablate the hyper-parameters in unknown-aware instance learning head (*i.e.*, the number  $M$  of selected features and the distance threshold  $\tau$ ).

Tab. 14 shows the results using different numbers of selected features in unknown-aware instance learning head when pre-training. When  $M$  is small, some foreground instances with relatively low scores are ignored, while when  $M$  is large, the matched background regions are increased. Considering these factors, we choose  $M$  to be 256.

Tab. 15 shows the performance under different distance thresholds in Eq. 4 in the main submission. The number of matched features is relatively small when using a lower  $\tau$ , thus can not fully exploit the unknown foreground instances. When using a larger threshold, some mismatches may occur. Finally, we set  $\tau$  to 0.3 as mentioned in our main submission.

Table 14: Ablation studies of the number  $M$  of selected features.

| $M$ | Waymo L2 AP / APH    |                      |                      |                      |
|-----|----------------------|----------------------|----------------------|----------------------|
|     | Overall              | Vehicle              | Pedestrian           | Cyclist              |
| 128 | 67.71 / 64.98        | 67.91 / 67.45        | 68.54 / 61.87        | 66.67 / 65.63        |
| 256 | <b>68.33 / 65.69</b> | <b>68.17 / 67.70</b> | <b>68.82 / 62.39</b> | <b>68.00 / 67.00</b> |
| 512 | 67.93 / 65.24        | 68.04 / 67.36        | 68.63 / 62.12        | 67.14 / 66.23        |

### E.2 More Results of Pre-training Scalability

In this section, we show more results to verify the pre-training scalability. We pre-train the model on the small, middle and large splits of the ONCE dataset and then fine-tune the model on 3% Waymo

Table 15: Ablation studies of the distance threshold  $\tau$ .

| $\tau$ | Waymo L2 AP/APH      |                      |                      |                      |
|--------|----------------------|----------------------|----------------------|----------------------|
|        | Overall              | Vehicle              | Pedestrian           | Cyclist              |
| 0.1    | 67.90 / 65.22        | 68.01 / 67.54        | 68.52 / 62.01        | 67.17 / 66.12        |
| 0.3    | <b>68.33 / 65.69</b> | <b>68.17 / 67.70</b> | <b>68.82 / 62.39</b> | <b>68.00 / 67.00</b> |
| 0.5    | 67.82 / 65.15        | 67.73 / 67.26        | 68.26 / 61.73        | 67.49 / 66.46        |

124 and 20% KITTI train data. As shown in Tab. 16, as the scale of the pre-training dataset and the  
125 diversity of scenarios increases, the performance of fine-tuning on the downstream dataset will also  
126 improve.

Table 16: The pre-training scalability. We use ONCE to pre-train and Waymo and KITTI to fine-tune.

| Pre-training dataset | Waymo L2 AP/APH      |                      |                      |                      | KITTI Moderate mAP |              |              |              |
|----------------------|----------------------|----------------------|----------------------|----------------------|--------------------|--------------|--------------|--------------|
|                      | Overall              | Vehicle              | Pedestrian           | Cyclist              | Overall            | Car          | Pedestrian   | Cyclist      |
| ONCE ( $\sim 100k$ ) | 68.33 / 65.69        | 68.17 / 67.70        | 68.82 / 62.39        | 68.00 / 67.00        | 69.43              | 82.75        | 57.59        | 67.96        |
| ONCE ( $\sim 500k$ ) | 69.04 / 66.52        | 68.69 / 68.23        | 69.81 / 63.74        | 68.61 / 67.60        | 71.36              | 83.17        | 58.14        | 72.78        |
| ONCE ( $\sim 1M$ )   | <b>69.63 / 67.08</b> | <b>69.03 / 68.57</b> | <b>70.54 / 64.34</b> | <b>69.33 / 68.33</b> | <b>72.37</b>       | <b>83.47</b> | <b>59.84</b> | <b>73.81</b> |

### 127 E.3 Results of fine-tuning on ONCE.

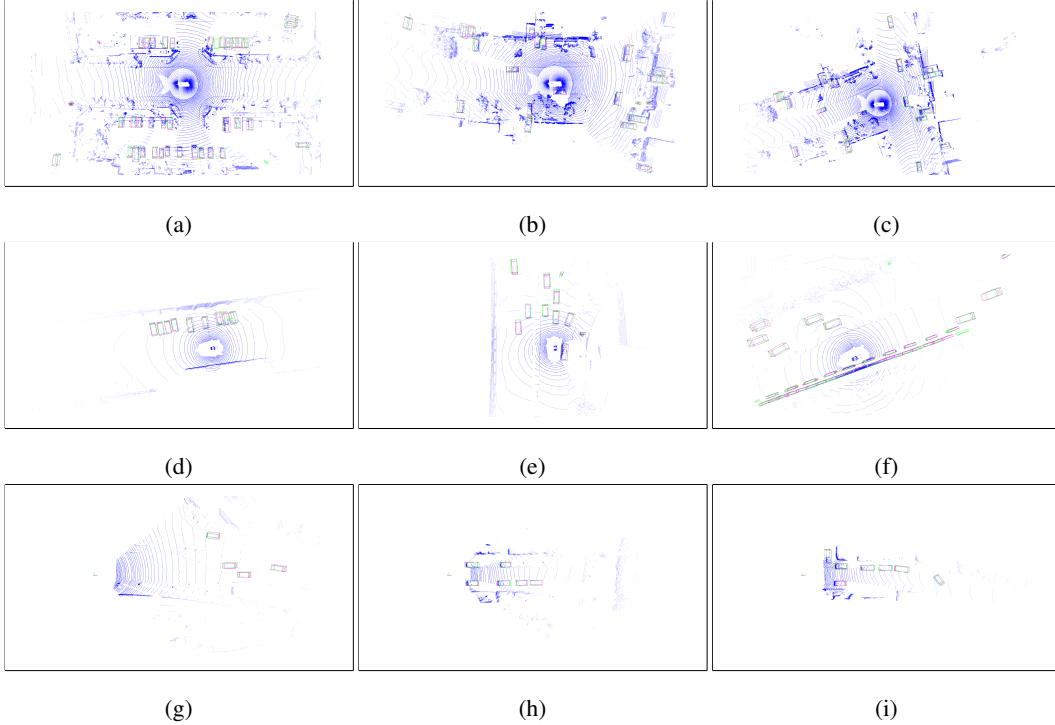

Figure 10: Visualization of fine-tuning results. We visualize the results of three downstream datasets. (a-c): results of Waymo. (d-f): results of nuScenes. (g-i): results of KITTI. The green and red bounding boxes represent ground-truths and detector predictions, respectively.

128 In our main submission, we report the fine-tuning performance on multiple datasets which are  
129 different from the pre-training dataset. Here, we show some fine-tuning performance on ONCE. As  
130 shown in Tab. 17, the performance can be largely improved when the baseline detectors are initialized  
131 by AD-PT. For example, when using SECOND as the baseline detector, the overall performance can  
132 be improved from 56.47% to 64.10% (+7.63%). We use the ONCE train set to fine-tune the model.

Table 17: The fine-tuning performance on ONCE validation set.

| Init.                 | SECOND       |              |              |              | CenterPoint  |              |              |              |
|-----------------------|--------------|--------------|--------------|--------------|--------------|--------------|--------------|--------------|
|                       | Overall      | 0-30m        | 30-50m       | >50m         | Overall      | 0-30m        | 30-50m       | >50m         |
| Random Initialization | 56.47        | 65.94        | 51.05        | 36.44        | 64.94        | 74.52        | 59.47        | 44.28        |
| AD-PT Initialization  | <b>64.10</b> | <b>74.34</b> | <b>57.69</b> | <b>41.23</b> | <b>67.73</b> | <b>76.48</b> | <b>61.85</b> | <b>46.29</b> |

#### E.4 Visualization Results.

Fig. 10 shows the visualization results of three downstream datasets (*i.e.*, Waymo, nuScenes, KITTI).

#### References

- [1] Holger Caesar, Varun Bankiti, Alex H Lang, Sourabh Vora, Venice Erin Liong, Qiang Xu, Anush Krishnan, Yu Pan, Giancarlo Baldan, and Oscar Beijbom. nusenes: A multimodal dataset for autonomous driving. In *Proceedings of the IEEE/CVF Conference on Computer Vision and Pattern Recognition*, pages 11621–11631, 2020. 4
- [2] Andreas Geiger, Philip Lenz, and Raquel Urtasun. Are we ready for autonomous driving? the kitti vision benchmark suite. In *Proceedings of the IEEE/CVF Conference on Computer Vision and Pattern Recognition*, pages 3354–3361, 2012. 4
- [3] Zhiwei Lin and Yongtao Wang. Bev-mae: Bird’s eye view masked autoencoders for outdoor point cloud pre-training. *arXiv preprint arXiv:2212.05758*, 2022. 5
- [4] Jiageng Mao, Minzhe Niu, Chenhan Jiang, Hanxue Liang, Jingheng Chen, Xiaodan Liang, Yamin Li, Chaoqiang Ye, Wei Zhang, Zhenguo Li, et al. One million scenes for autonomous driving: Once dataset. *arXiv preprint arXiv:2106.11037*, 2021. 3
- [5] Pei Sun, Henrik Kretschmar, Xerxes Dotiwalla, Aurelien Chouard, Vijaysai Patnaik, Paul Tsui, James Guo, Yin Zhou, Yuning Chai, Benjamin Caine, et al. Scalability in perception for autonomous driving: Waymo open dataset. In *Proceedings of the IEEE/CVF Conference on Computer Vision and Pattern Recognition*, pages 2446–2454, 2020. 4
